# Supplementary material for: Investigating Co-occurrence among Look-alike Species: The Case of Three Bears in Northeast India
Source: MDPI journal article supplement (doi:10.3390/d14090717), 2022-08-29
Supplement: s1 [file s1]

**Table S4.** Trees with bear claw marks found in Balpakram National Park, Meghalaya, India, 2018–2019 and 2022, identified first by local Garo name, then converted to scientific name. Of 74 climbed trees, 49 were identified to scientific name. Among these, 2 genera were not previously reported as climbed by bears in other studies.

| Genus, species                  | No. of climbed trees |
|---------------------------------|----------------------|
| <i>Artocarpus heterophyllus</i> | 2                    |
| <i>Callicarpa arborea</i>       | 1                    |
| <i>Castanopsis purpurella</i>   | 7                    |
| <i>Cinnamomum tamala</i>        | 1                    |
| <i>Dillenia</i> sp.             | 1                    |
| <i>Ficus</i> sp.                | 6                    |
| <i>Ilex embedioides</i>         | 2                    |
| * <i>Ixonanthes khasiana</i>    | 3                    |
| <i>Litsea sebefera</i>          | 12                   |
| <i>Magnolia</i> sp.             | 1                    |
| <i>Musa falviflora</i>          | 1                    |
| * <i>Persea villosa</i>         | 4                    |
| <i>Terminalia bellirica</i>     | 5                    |
| <i>Tetrameles nudiflora</i>     | 2                    |
| <i>Vitex penducularis</i>       | 1                    |
| Total                           | 49                   |

\* Genus not recorded as a bear-climbed tree in previous studies. Note: *Ixonanthes khasiana* is endemic to Northeast India.
